# Supplementary material for: Augmentation of brain tumor interstitial flow via focused ultrasound promotes brain-penetrating nanoparticle dispersion and transfection
Source: PubMed Central journal article supplement — Sci Adv. 2020 May 1;6(18):eaay1344. doi: 10.1126/sciadv.aay1344 (PMC7195188; doi:10.1126/sciadv.aay1344), 2020-05-01
Supplement: aay1344_SM.pdf [file aay1344_SM.pdf]

## Supplementary Materials for

### **Augmentation of brain tumor interstitial flow via focused ultrasound promotes brain-penetrating nanoparticle dispersion and transfection**

Colleen T. Curley, Brian P. Mead, Karina Negron, Namho Kim, William J. Garrison, G. Wilson Miller, Kathryn M. Kingsmore, E. Andrew Thim, Ji Song, Jennifer M. Munson, Alexander L. Klibanov, Jung Soo Suk\*, Justin Hanes\*, Richard J. Price\*

\*Corresponding author. Email: [rprice@virginia.edu](mailto:rprice@virginia.edu) (R.J.P.); [hanes@jhmi.edu](mailto:hanes@jhmi.edu) (J.H.); [jsuk@jhmi.edu](mailto:jsuk@jhmi.edu) (J.S.S.)

Published 1 May 2020, *Sci. Adv.* **6**, eaay1344 (2020)

DOI: [10.1126/sciadv.aay1344](https://doi.org/10.1126/sciadv.aay1344)

#### **This PDF file includes:**

Fig. S1

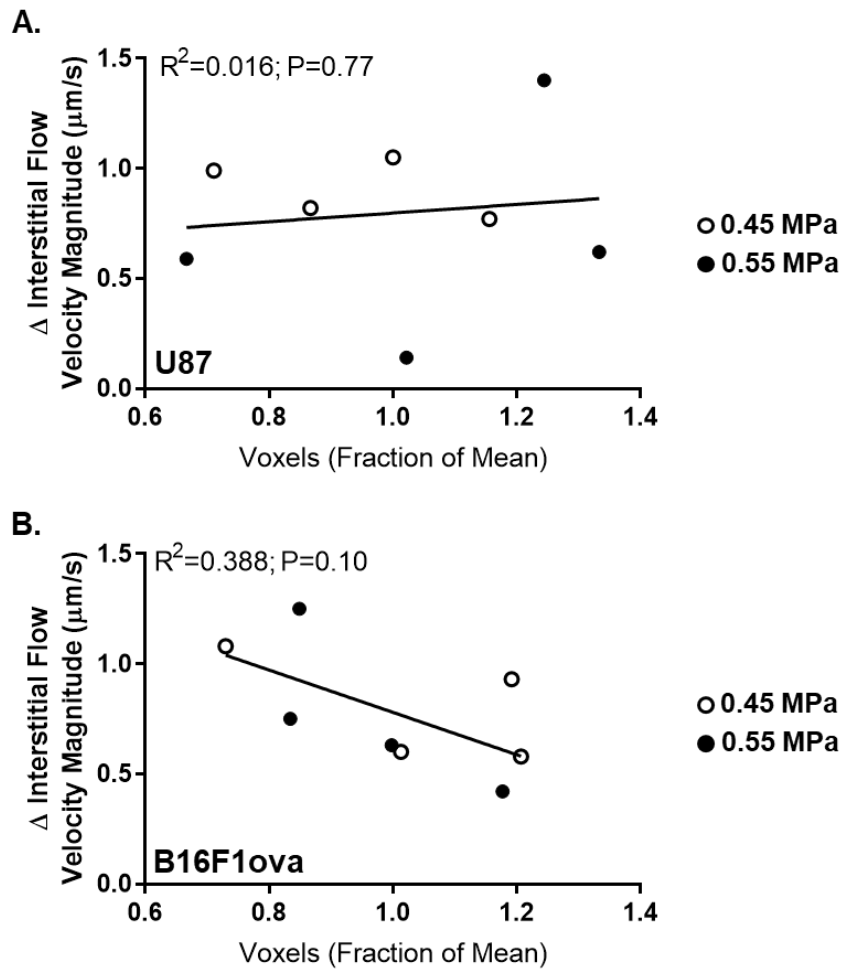

**Figure S1. Interstitial velocity magnitude changes after application of FUS + MBs as a function of tumor size.** Changes in interstitial flow due to FUS + MBs in U87 (A) and B16F1ova (B) tumors are shown as a function of tumor size, as estimated by the number of voxels in the MRI transport analyses. Lines are linear regressions.  $R^2$  and P values are provided for correlation analyses.
